# Supplementary material for: Phenolic Fractions from Vaccinium vitis-idaea L. and Their Antioxidant and Anticancer Activities Assessment
Source: PubMed Central journal article supplement (PMC7763140; doi:10.3390/antiox9121261), 2020-12-11
Supplement: antioxidants-09-01261-s001.pdf [file antioxidants-09-01261-s001.pdf]

**Table S1.** HPLC-PDA method validation parameters of linearity, LOD, LOQ, and precision for phenolics.

| Compound                          | Linearity range (µg/mL) | Calibration curve        | Coefficient of determination ( $r^2$ ) | LOD (µg/mL) | LOQ (µg/mL) | RSD, (% , $n = 18$ ) |
|-----------------------------------|-------------------------|--------------------------|----------------------------------------|-------------|-------------|----------------------|
| Cryptochlorogenic acid            | 3.1–50.0                | $f(x) = 56700x - 91900$  | 0.99993                                | 0.11        | 0.33        | 0.5                  |
| Afzelin                           | 1.6–50.0                | $f(x) = 36600x + 2650$   | 0.99983                                | 0.27        | 0.81        | 1.4                  |
| Arbutin                           | 31.3–500.0              | $f(x) = 6430x + 31200$   | 0.99996                                | 0.56        | 1.70        | 0.1                  |
| Astragalin                        | 1.6–50.0                | $f(x) = 42800x - 1820$   | 0.99979                                | 0.25        | 0.76        | 1.3                  |
| Avicularin                        | 3.1–50.0                | $f(x) = 50100x + 6630$   | 0.99972                                | 0.24        | 0.73        | 0.5                  |
| Benzoic acid                      | 3.1–50.0                | $f(x) = 7700x + 723$     | 0.99994                                | 0.07        | 0.23        | 0.2                  |
| Caffeic acid                      | 1.6–50.0                | $f(x) = 112000x - 24100$ | 0.99974                                | 0.37        | 1.25        | 1.5                  |
| (+)-Catechin                      | 3.1–200.0               | $f(x) = 13000x - 3080$   | 0.99999                                | 0.31        | 1.02        | 0.2                  |
| Chlorogenic acid                  | 3.1–50.0                | $f(x) = 48500x - 47200$  | 0.99927                                | 0.27        | 0.83        | 0.4                  |
| Cyanidin-3- <i>O</i> -arabinoside | 1.6–100.0               | $f(x) = 47300x + 30900$  | 0.99998                                | 0.14        | 0.42        | 1.3                  |
| Cyanidin-3- <i>O</i> -galactoside | 1.6–100.0               | $f(x) = 81200x + 54000$  | 0.99999                                | 0.06        | 0.18        | 0.2                  |
| Cyanidin-3- <i>O</i> -glucoside   | 1.6–100.0               | $f(x) = 41900x + 26700$  | 0.99997                                | 0.22        | 0.66        | 1.4                  |
| (-)-Epicatechin                   | 3.1–50.0                | $f(x) = 13300x - 3010$   | 0.99941                                | 0.13        | 0.43        | 0.4                  |
| Ferulic acid                      | 1.6–50.0                | $f(x) = 105000x - 7950$  | 0.99994                                | 0.47        | 1.42        | 1.0                  |
| Hyperoside                        | 3.1–50.0                | $f(x) = 62900x - 1140$   | 0.99973                                | 0.19        | 0.58        | 0.3                  |
| Isoquercitrin                     | 3.1–50.0                | $f(x) = 39100x + 2560$   | 0.99995                                | 0.13        | 0.39        | 0.6                  |
| Kaempferol                        | 1.6–50.0                | $f(x) = 91700x - 5530$   | 0.99996                                | 0.05        | 0.15        | 1.7                  |
| Nicotiflorin                      | 1.6–50.0                | $f(x) = 30600x + 7080$   | 1.00000                                | 0.05        | 0.14        | 1.2                  |
| Neochlorogenic acid               | 1.6–50.0                | $f(x) = 42500x - 15000$  | 0.99970                                | 0.32        | 0.97        | 1.3                  |
| <i>p</i> -Coumaric acid           | 1.6–50.0                | $f(x) = 179000x - 15000$ | 0.99998                                | 0.17        | 0.53        | 1.0                  |
| Procyanidin A1                    | 3.1–50.0                | $f(x) = 14400x - 17000$  | 0.99932                                | 0.90        | 2.67        | 0.4                  |
| Procyanidin A2                    | 3.1–50.0                | $f(x) = 17200x - 4410$   | 0.99915                                | 0.43        | 1.29        | 0.5                  |
| Procyanidin B1                    | 3.1–50.0                | $f(x) = 8440x + 8740$    | 0.99993                                | 0.07        | 0.22        | 0.8                  |
| Procyanidin B2                    | 3.1–50.0                | $f(x) = 7830x + 1430$    | 0.99982                                | 0.13        | 0.38        | 0.6                  |
| Procyanidin B3                    | 3.1–50.0                | $f(x) = 8990x - 7070$    | 0.99933                                | 0.21        | 0.63        | 0.5                  |
| Procyanidin C1                    | 3.1–50.0                | $f(x) = 7620x + 1850$    | 0.99949                                | 0.22        | 0.65        | 0.7                  |
| Protocatechuic acid               | 3.7–58.8                | $f(x) = 79400x + 5420$   | 0.99998                                | 0.04        | 0.14        | 1.1                  |
| Quercetin                         | 1.6–50.0                | $f(x) = 74800x - 70600$  | 0.99984                                | 0.13        | 0.38        | 1.6                  |
| Guaiaverin                        | 3.3–50.0                | $f(x) = 38600x + 2290$   | 0.99996                                | 0.12        | 0.36        | 1.2                  |
| 6"- <i>O</i> -acetylisoquercitrin | 1.6–50.0                | $f(x) = 34600x + 527$    | 0.99999                                | 0.05        | 0.15        | 1.5                  |
| Quercitrin                        | 3.1–50.0                | $f(x) = 39500x + 3580$   | 0.99961                                | 0.23        | 0.71        | 0.5                  |
| Resveratrol                       | 1.6–50.0                | $f(x) = 142000x + 7600$  | 0.99999                                | 0.16        | 0.47        | 1.7                  |
| Reynoutrin                        | 1.6–25.0                | $f(x) = 34900x - 1790$   | 0.99999                                | 0.03        | 0.09        | 0.6                  |
| Rutin                             | 3.1–50.0                | $f(x) = 30300x - 3050$   | 0.99993                                | 0.10        | 0.30        | 0.4                  |
| Sinapic acid                      | 1.6–50.0                | $f(x) = 99000x + 22200$  | 0.99988                                | 0.08        | 0.25        | 1.1                  |
| <i>trans</i> -Cinnamic acid       | 3.1–50.0                | $f(x) = 137000x - 21400$ | 0.99989                                | 0.12        | 0.36        | 0.5                  |
| Vanillic acid                     | 1.6–50.0                | $f(x) = 76400x + 19900$  | 0.99999                                | 0.02        | 0.08        | 1.7                  |

**Table S2.** HPLC-PDA method validation parameters of trueness for phenolics.

| Compound                          | Low concentration level |       | Medium concentration level |       | High concentration level |       |
|-----------------------------------|-------------------------|-------|----------------------------|-------|--------------------------|-------|
|                                   | % Recovery              | % RSD | % Recovery                 | % RSD | % Recovery               | % RSD |
| Cryptochlorogenic acid            | 105.3                   | 0.8   | 96.5                       | 0.6   | 100.6                    | 0.6   |
| Afzelin                           | 100.8                   | 0.9   | 102.4                      | 0.3   | 100.3                    | 0.4   |
| Arbutin                           | 102.1                   | 1.4   | 98.7                       | 1.2   | 100.1                    | 1.1   |
| Astragalin                        | 105.0                   | 1.5   | 102.1                      | 1.0   | 100.3                    | 0.9   |
| Avicularin                        | 95.3                    | 1.4   | 99.5                       | 1.3   | 99.5                     | 0.9   |
| Benzoic acid                      | 102.9                   | 1.7   | 99.7                       | 1.6   | 100.2                    | 1.6   |
| Caffeic acid                      | 104.3                   | 1.1   | 101.6                      | 0.5   | 100.4                    | 0.3   |
| (+)-Catechin                      | 107.0                   | 1.0   | 99.1                       | 1.4   | 100.0                    | 1.2   |
| Chlorogenic acid                  | 103.1                   | 1.1   | 98.5                       | 0.4   | 99.1                     | 0.2   |
| Cyanidin-3- <i>O</i> -arabinoside | 92.5                    | 1.0   | 99.6                       | 0.8   | 100.1                    | 1.1   |
| Cyanidin-3- <i>O</i> -galactoside | 92.7                    | 1.4   | 100.3                      | 1.1   | 99.9                     | 1.2   |
| Cyanidin-3- <i>O</i> -glucoside   | 92.9                    | 1.3   | 100.8                      | 1.5   | 99.8                     | 1.1   |
| (-)-Epicatechin                   | 95.4                    | 1.2   | 95.9                       | 1.6   | 97.8                     | 1.3   |
| Ferulic acid                      | 107.5                   | 1.1   | 98.1                       | 0.9   | 100.1                    | 0.3   |
| Hyperoside                        | 96.1                    | 1.5   | 99.4                       | 1.3   | 99.5                     | 0.9   |
| Isoquercitrin                     | 95.1                    | 1.4   | 101.0                      | 1.2   | 99.8                     | 0.7   |
| Kaempferol                        | 99.9                    | 0.4   | 100.5                      | 0.3   | 99.9                     | 0.3   |
| Nicotiflorin                      | 98.1                    | 1.3   | 99.9                       | 1.1   | 100.0                    | 0.5   |
| Neochlorogenic acid               | 105.4                   | 1.5   | 97.1                       | 1.0   | 100.6                    | 1.6   |
| <p>-Coumaric acid</p>             | 103.0                   | 0.3   | 100.1                      | 0.2   | 99.9                     | 0.4   |
| Procyanidin A1                    | 107.1                   | 1.6   | 90.1                       | 1.7   | 90.3                     | 1.2   |
| Procyanidin A2                    | 105.0                   | 1.6   | 98.9                       | 1.5   | 100.9                    | 1.3   |
| Procyanidin B1                    | 91.8                    | 1.6   | 99.9                       | 1.4   | 99.8                     | 1.4   |
| Procyanidin B2                    | 107.0                   | 1.7   | 106.9                      | 1.7   | 106.2                    | 1.6   |
| Procyanidin B3                    | 105.9                   | 1.6   | 100.6                      | 1.7   | 100.8                    | 1.0   |
| Procyanidin C1                    | 98.9                    | 1.6   | 101.6                      | 1.6   | 100.3                    | 1.3   |
| Protocatechuic acid               | 97.2                    | 0.6   | 100.8                      | 0.1   | 99.9                     | 0.1   |
| Quercetin                         | 107.7                   | 0.4   | 101.7                      | 0.3   | 100.3                    | 0.4   |
| Guaiaverin                        | 100.8                   | 1.1   | 100.5                      | 0.9   | 100.2                    | 0.5   |
| 6"- <i>O</i> -acetylisoquercitrin | 102.7                   | 0.9   | 100.3                      | 1.0   | 100.0                    | 0.7   |
| Quercitrin                        | 101.6                   | 0.8   | 101.7                      | 0.6   | 100.5                    | 0.6   |
| Resveratrol                       | 95.4                    | 1.6   | 100.3                      | 1.4   | 100.1                    | 0.5   |
| Reynoutrin                        | 100.5                   | 0.9   | 100.1                      | 0.6   | 100.0                    | 0.6   |
| Rutin                             | 100.9                   | 1.4   | 100.3                      | 1.0   | 100.2                    | 1.3   |
| Sinapic acid                      | 92.2                    | 0.6   | 101.0                      | 0.7   | 99.7                     | 0.4   |
| <i>trans</i> -Cinnamic acid       | 103.1                   | 0.9   | 98.2                       | 0.8   | 100.3                    | 0.6   |
| Vanillic acid                     | 98.2                    | 0.2   | 99.9                       | 0.2   | 99.9                     | 0.1   |
